# Supplementary material for: Shaping thin film growth and microstructure pathways via plasma and deposition energy: a detailed theoretical, computational and experimental analysis
Source: Royal Society of Chemistry journal article supplement (doi:10.1039/c6cp06003j), 2017-01-01

## Supplementary information

### Importance of RF/UHF dual frequency PECVD

Our earlier experience shows that RF/UHF dual frequency sources can produce significantly high plasma density even at low power. If we apply equal power by RF and UHF sources the plasma density is much smaller than that of their combined effect. Plasma density is also radially uniform, which favors the deposition of uniform film thickness up to larger area.

#### How some view plasma processing?

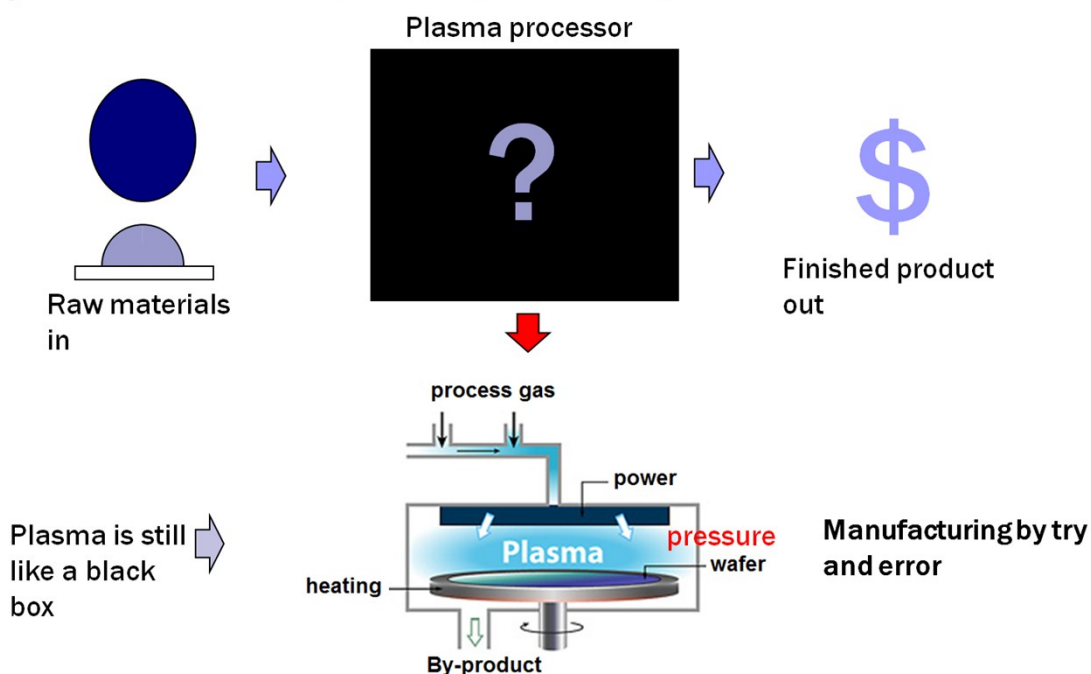

#### How to control and make plasma based thin films?

##### Design of Advanced Plasma Source and plasma process

###### Control of electron temperature and plasma density

- **Advanced type of plasma sources** (RF/UHF hybrid source)

###### Control of plasma chemistry

- **Monitoring and controlling of plasma parameters and radicals**

###### Correlation of film formation mechanism in terms of plasma chemistry

- **Modeling and integrated plasma diagnostics**
- **Film properties** (depo. rate, microstructure, optical, electrical, etc.)

##### Nanostructured thin film growth and control

## Exploring new plasmas and processes

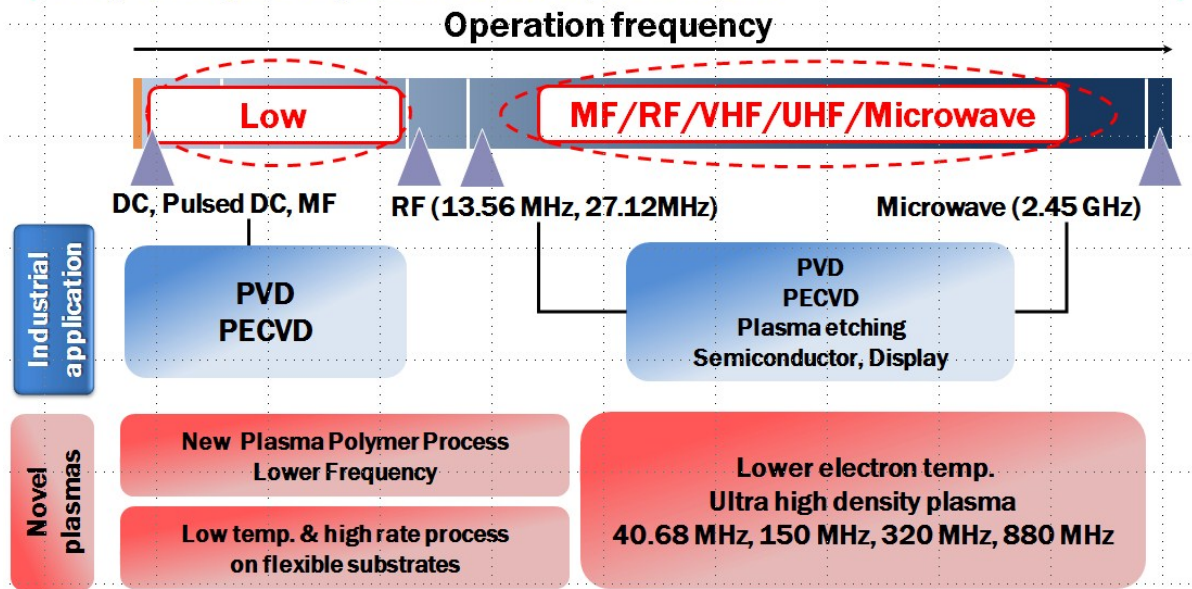

One can lower reaction activation energy by increasing the plasma excitation frequency from radio frequency (RF) to very high frequency (VHF) and in the range of ultra high frequency (UHF) to microwave. [J. Appl. Phys. 116, 134903 \(2014\).](#)

## Importance and suitability of RF/UHF hybrid plasma

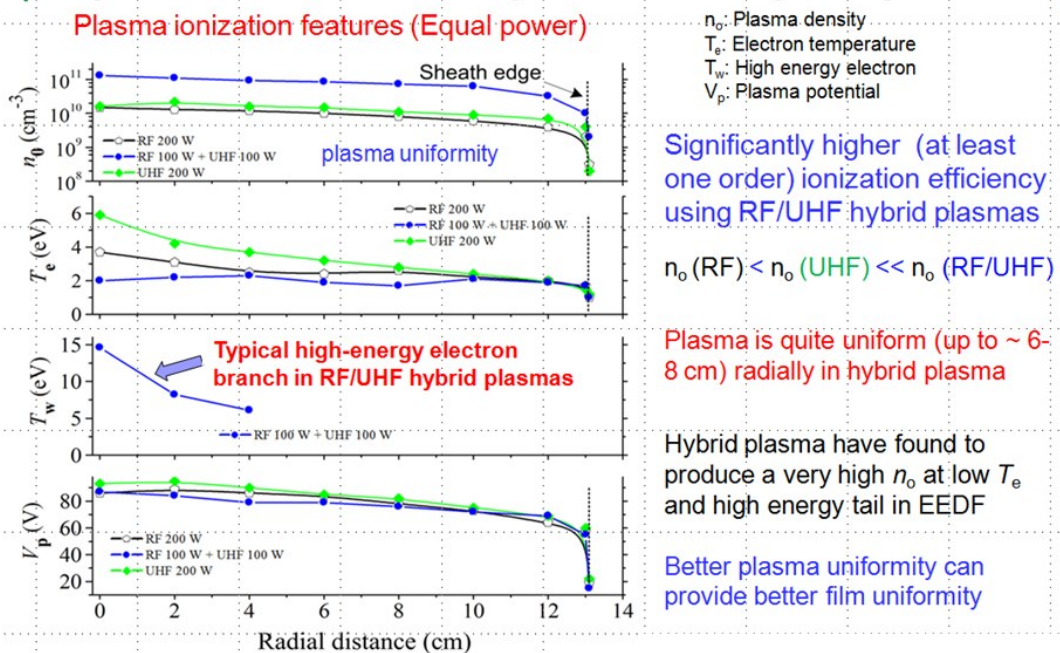

## Complexities in studying plasma chemistry

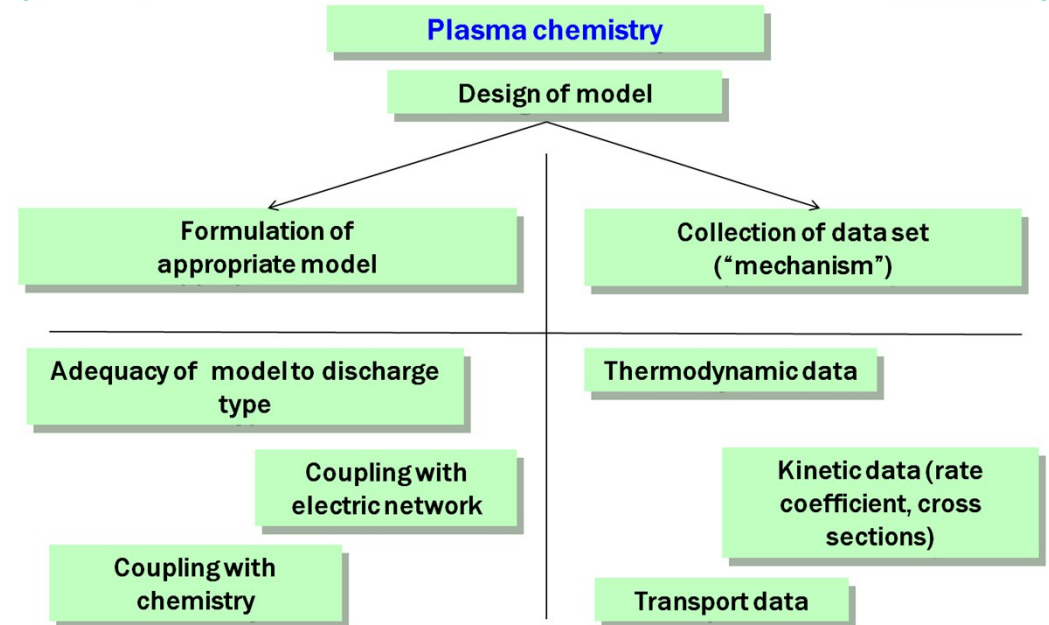

## Generation Rate of Plasma Species by Electron Collisions

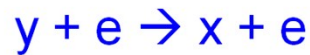

$$\frac{dn_x}{dt} = k_x n_e n_y$$

Example

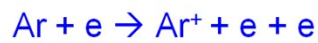

$$\frac{dn_e}{dt} = k_{iz} n_e n_{\text{gas}}$$

$lhs =$  is the number of electrons (and ions) generated per  $\text{cm}^3$  per second

$k_{iz} =$  rate coefficient

## Simplified chemical model

### Theoretical Model

The number of interacting species at any time per unit volume during PECVD process is conserved. The governing rate equation is

$$\frac{\partial n_i}{\partial t} = \left( \sum_j \alpha_{jk} R_j \right)_i - \frac{A}{V} \Gamma_{tot} \quad (1)$$

$i \rightarrow$  a particular species like neutral, ions, e, ...

$\sum_j \rightarrow$  sum over every reaction

Dimension of the Equation:  $1/(m^3 \cdot \text{Sec})$

#### Creation

ionization, dissociation, and chemical reaction

#### Loss

+ve & -ve ion recombination, excitation, ion-neutral charge exchange, energy transfer to neutrals by collision, etc.

lhs  $\equiv$  density of species at a given time

$\alpha_{jk} \equiv$  Chemical species (reactant or product)

$R \equiv$  Reactivity of chemical reaction

$\Gamma_{tot} \equiv$  Total flux;  $A = \text{Area}$ ;  $V = \text{Volume}$

### Assumption

**Assumption: We consider the collisions and chemical reaction to be a two-body process**

$R$  is the reactivity of a particular reaction (a product of interacting species)

$$R_j = k_j n_{j1} n_{j2} \quad (2)$$

$n_{j1}$  and  $n_{j2}$  are number densities ( $\text{cm}^{-3}$ ) of the two interacting species

$k_j$  is the integrated rate coefficient at a given temperature

$\alpha_{jk} \rightarrow$  chemical species that can be a product or reactant

$\alpha_{jk} = +ve$  if the species  $k$  is a product

$= -ve$  if the species  $k$  is a reactant

$= 0$  if not participate in the collision or chemical reaction

$= 0$  if equally balanced on both sides of the reaction

The magnitude of  $\alpha_{jk}$  refers to new species produced or recombination reaction

Example:  $\text{H}_2^+ + e \rightarrow 2\text{H}$  ( $\alpha_{j,e} = -1$ ,  $\alpha_{j,\text{H}_2^+} = -1$ , and  $\alpha_{i,\text{H}} = 2$ )

### Computation scheme and procedure

Taking density rates for all species

The rate coefficient:  $f(T_e)$

$$\frac{\partial n_i}{\partial t} = \left( \sum_j C_{jk} R_j \right)_i - \frac{A}{V} \Gamma_{tot}$$

$$k_j = \kappa \int_0^\infty E \sigma_i(E) f(E) dE ; \quad \kappa = \sqrt{\frac{2e}{m_e}}$$

#### Energy/power balance

$$\frac{3}{2} \frac{d}{dt} (n_0 T_e) = \frac{P_{in}}{V} - P_1 - P_2 - P_3 - P_4$$

$P_{in}$ : Power input

$P_1$ : power density of excitation

$P_2$ : power density loss due to electron-neutral collision

$P_3$ : power density of ionization

$P_4$ : power loss to the wall due to the charged species

Taking density rates for all species and rate coefficients set of 45 equations involving 44 species (Table 1) in 62 bulk reactions (Table 2) are constructed in MathCAD and called by the "odesolve()" solver for the time-dependent  $T_e$  and density of all plasma species.

Computations in MathCAD ODE solver: "odesolve()"

## Energy deposition

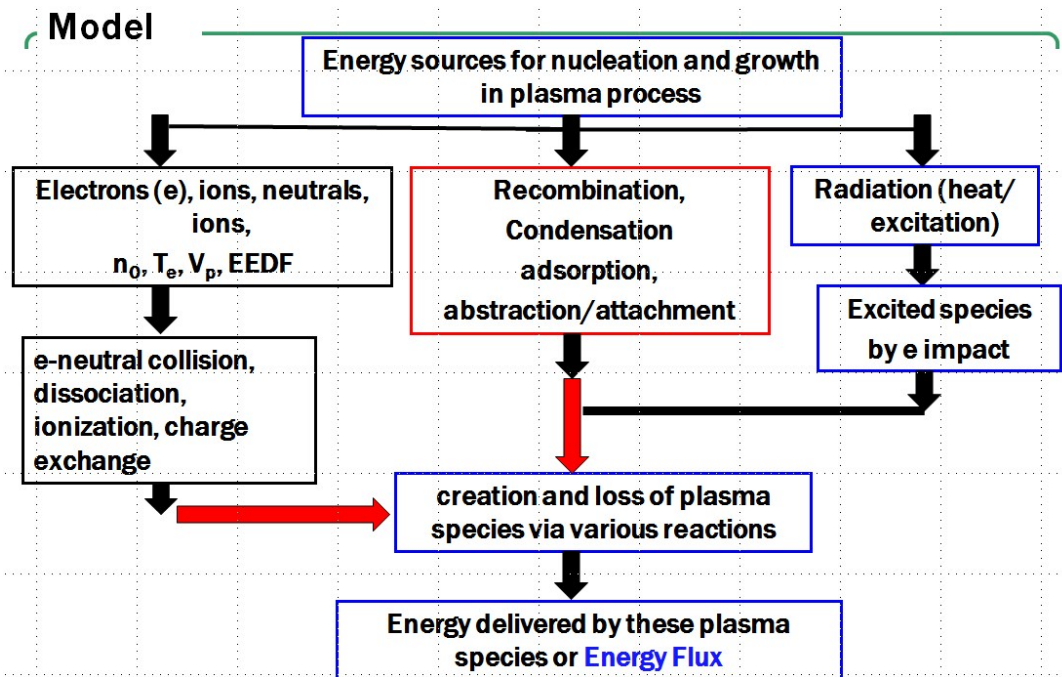

## **Various contribution of energy flux to the substrate**

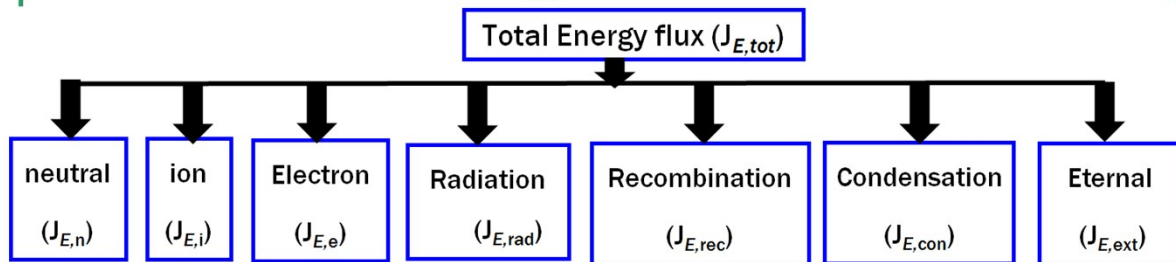

$J_{E,n} \equiv$  Contribution of neutral species of the background gas and the neutral particles contributing to the film growth

$J_{E,i} \equiv$  Contribution of ions (Bohm Flux, in the sheath covering the substrate,

$J_{E,e} \equiv$  Contribution of electrons

$J_{E,rad} \equiv$  Contribution of heat/light radiation from the surface

$J_{E,rec} \equiv$  Contribution of energy released by recombination

$J_{E,con} \equiv$  Contribution of energy released by condensation

$J_{E,ext} \equiv$  Contribution of any external source or chamber heating

## Film microstructure by TEM near the transition region

25 sccm of  $\text{SiH}_4$  flow rate

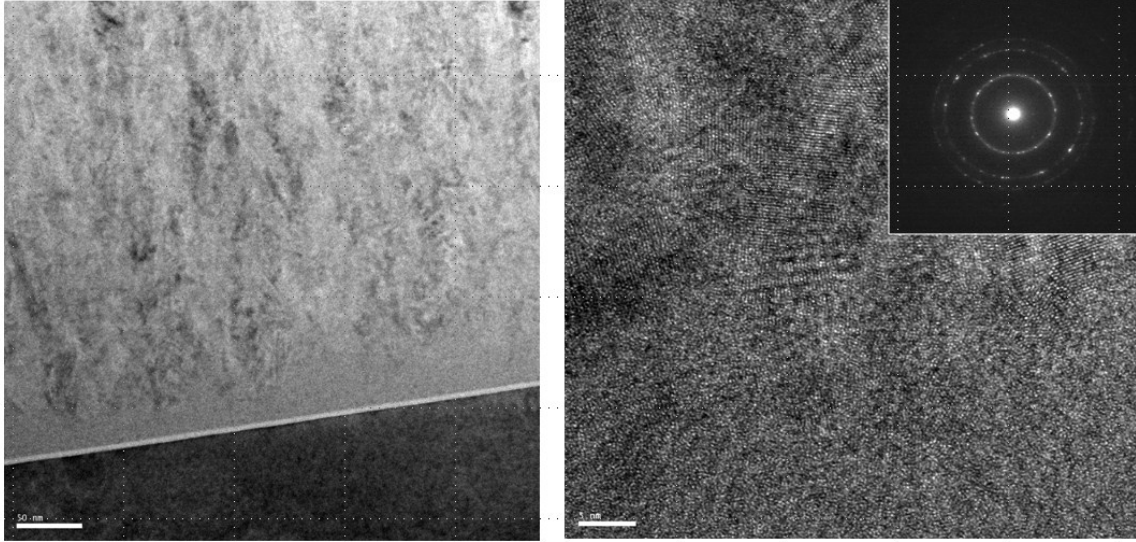

Supplement: c6cp06003j1.pdf [file c6cp06003j1.pdf]
